# Supplementary material
Source: publisher figshare collection journal article supplement (https://frontiersin.figshare.com/ndownloader/files/19878809)
Supplement: Supplementary file 1 [file 19878809]

**APPENDIX.**

**Supplementary Table 1. German translation of the BCSQ-12-SS**

| **BCSQ-12-SS** | **German translation BCSQ-12-SS** |
| --- | --- |
|  |  |
| **Frenetic - Overload** | **Frenetic - Overload** |
| 1. I think I invest more than is healthy in my commitment to my studies. | 1. Ich denke, ich investiere mehr in mein Studium als gesund für mich ist. |
| 4. I neglect my personal life to pursue great accomplishments in studying. | 4. Ich vernachlässige mein Privatleben, um beim Studieren erfolgreich zu sein. |
| 7. I am endangering my health in pursuing good results in my studies. | 7. Ich gefährde meine Gesundheit, um gute Resultate im Studium zu erzielen. |
| 10. I ignore my own needs to satisfy the requirements of my studies. | 10. Ich vernachlässige meine eigenen Bedürfnisse, um den Anforderungen meines Studiums gerecht zu werden. |
|  |  |
| **Underchallenged – Lack of Development** | **Underchallenged – Lack of Development** |
| 2. I would like to study something else that would be more challenging to my abilities. | 2. Ich würde gerne etwas Anderes studieren, was mich mehr herausfordert als mein aktuelles Studium. |
| 5. I feel that my current studies are hampering the development of my abilities. | 5. Ich habe das Gefühl, dass mein aktuelles Studium die Entwicklung meiner Fähigkeiten eher hemmt als fördert. |
| 8. I would like to study something else in which I could better develop my talent. | 8. Ich würde gerne etwas Anderes studieren, wo sich meine Talente besser entfalten können. |
| 11. My studies do not provide me with opportunities to develop my abilities. | 11. Mein Studium bietet mir nicht genug Möglichkeiten, meine Fähigkeiten zu entwickeln. |
|  |  |
| **Worn-out - Neglect** | **Worn-out - Neglect** |
| 3. When the results of my studies are not good at all, I stop making an effort. | 3. Wenn die Leistungen in meinem Studium nicht gut sind, höre ich auf, mich anzustrengen. |
| 6. I give up in response to an obstacle in my studies. | 6. Ich gebe auf, wenn ich auf ein Hindernis im Studium stoße. |
| 9. I give up when faced with any difficulty in my tasks as a student. | 9. Wenn ich mit schwierigen Aufgaben im Studium konfrontiert bin, gebe ich auf. |
| 12. When the effort invested in studying is not enough, I give up. | 12. Wenn sich die Anstrengungen, die ich in mein Studium investiere nicht lohnen, bemühe ich mich nicht mehr. |
